# Supplementary material for: The Early Season Community of Flower-Visiting Arthropods in a High-Altitude Alpine Environment
Source: MDPI journal article supplement (doi:10.3390/insects13040393), 2022-04-16
Supplement: s1 [file s1]

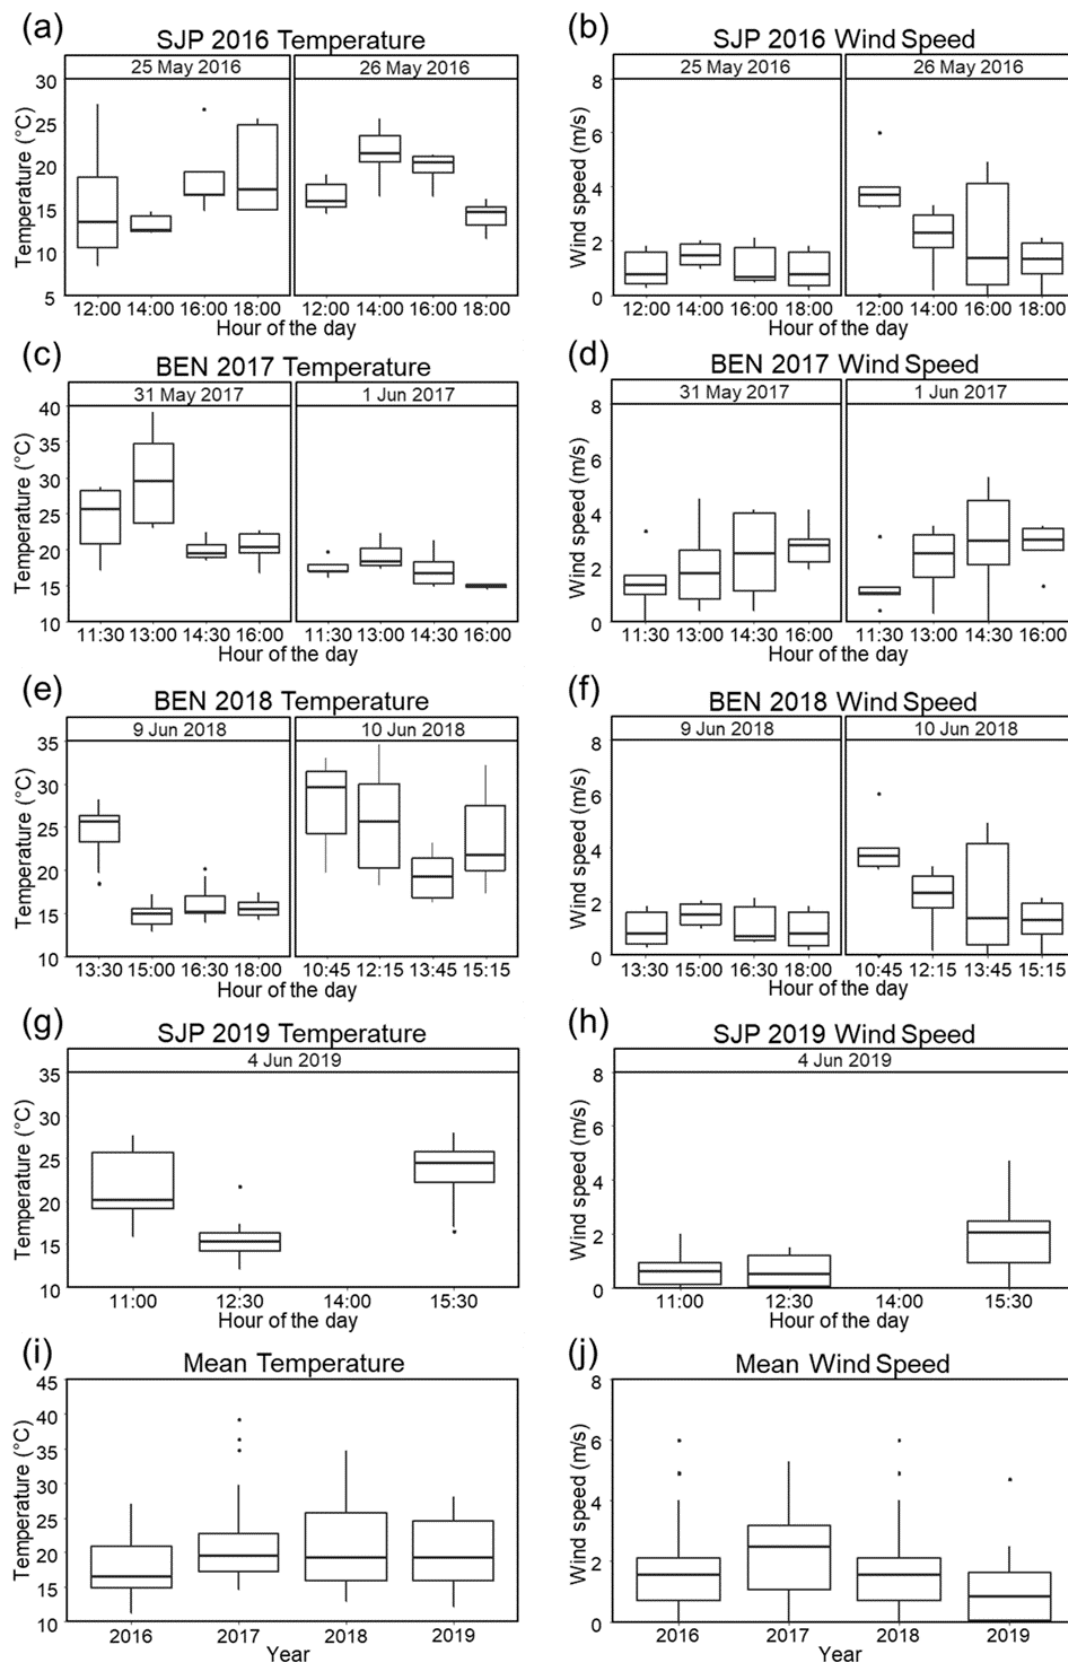

**Figure S1.** Boxplots of the micrometeorological conditions recorded during the timed observations: temperature and wind speed at SJP 2016 (a, b), BEN 2017 (c, d), BEN 2018 (e, f) and SJP 2019 (g, h) and mean temperature (i) and wind speed (j) through all years and sites.

**Table S1.** Taxonomists who identified the sampled arthropods and their affiliation.

| <b>Taxon</b>                                        | <b>Taxonomist (affiliation)</b>                                                                                                                                                                                                                                                                                                                                             |
|-----------------------------------------------------|-----------------------------------------------------------------------------------------------------------------------------------------------------------------------------------------------------------------------------------------------------------------------------------------------------------------------------------------------------------------------------|
| <b>ARACHNIDA</b>                                    |                                                                                                                                                                                                                                                                                                                                                                             |
| <b>Araneae</b>                                      | Paolo Pantini (Zoology of Invertebrate Section, Civic Museum of Natural Science Enrico Caffi, Bergamo, Italy)                                                                                                                                                                                                                                                               |
| <b>Oribatida</b>                                    | Massimo Plumari (Museo Civico di Lentate sul Seveso, Lentate sul Seveso, Italy)                                                                                                                                                                                                                                                                                             |
| <b>HEXAPODA</b>                                     |                                                                                                                                                                                                                                                                                                                                                                             |
| <b>Coleoptera</b>                                   | Mauro Gobbi                                                                                                                                                                                                                                                                                                                                                                 |
| <b>Coleoptera, Chrysomelidae</b>                    | Matteo Montagna (Department of Agricultural and Environmental Sciences - Production Landscape Agroenergy, University of Milan, Milan, Italy)                                                                                                                                                                                                                                |
| <b>Coleoptera, Meloidae</b>                         | Marco Alberto Bologna (Department of Science, Roma Tre University, Rome, Italy)                                                                                                                                                                                                                                                                                             |
| <b>Collembola</b>                                   | Pietro Paolo Fanciulli (Department of Life Sciences, University of Siena, Siena, Italy)<br>Barbara Valle (Department of Biosciences, University of Milan, Milan, Italy)                                                                                                                                                                                                     |
| <b>Diptera</b>                                      | Daniele Avesani                                                                                                                                                                                                                                                                                                                                                             |
| <b>Diptera, Agromyzidae</b>                         | Miloš Černý (Independent Taxonomist, Halenkovice, Czech Republic)                                                                                                                                                                                                                                                                                                           |
| <b>Diptera, Anthomyiidae</b>                        | Verner Michelsen                                                                                                                                                                                                                                                                                                                                                            |
| <b>Diptera, Chironomidae</b>                        | Valeria Lencioni (Research and Museum Collections Office, Climate and Ecology Unit, MUSE - Science Museum, Trento, Italy)                                                                                                                                                                                                                                                   |
| <b>Diptera, Chloropidae</b>                         | Emilia Petrovna Nartshuk (Zoological Institute, Russian Academy of Sciences, Saint Petersburg, Russia)                                                                                                                                                                                                                                                                      |
| <b>Diptera, Drosophilidae</b>                       | Gerhard Bächli (Department of Evolutionary Biology and Environmental Studies, University of Zurich, Zurich, Switzerland)                                                                                                                                                                                                                                                    |
| <b>Diptera, Phoridae</b>                            | Ronald Henry Lambert Disney (Department of Zoology, University of Cambridge, Cambridge, United Kingdom)                                                                                                                                                                                                                                                                     |
| <b>Diptera, Scathophagidae</b>                      | Andrey Ozerov (Zoological Museum, Moscow State University, Moscow, Russia)                                                                                                                                                                                                                                                                                                  |
| <b>Diptera, Sphaeroceridae</b>                      | Jindřich Roháček (Department of Entomology, Silesian Museum, Opava, Czech Republic)                                                                                                                                                                                                                                                                                         |
| <b>Diptera, Syrphidae</b>                           | Daniele Sommaggio (Department of Agricultural and Food Sciences, University of Bologna, Bologna, Italy)                                                                                                                                                                                                                                                                     |
| <b>Hemiptera, Auchenorrhyncha</b>                   | Davide Scaccini (Department of Agronomy Food Natural Resources Animals and Environment, University of Padua, Padua, Italy)                                                                                                                                                                                                                                                  |
| <b>Hemiptera, Sternorrhyncha (2016, 2017, 2018)</b> | Lidia Limonta (Department of Food Environmental and Nutritional Sciences, University of Milan, Italy)                                                                                                                                                                                                                                                                       |
| <b>Hemiptera, Sternorrhyncha (2019)</b>             | Alice Casiraghi (Department of Evolutionary Biology Ecology and Environmental Sciences, University of Barcelona, Spain; Institute for Integrative Systems Biology, University of Valencia, Spain)<br>Nicolas Pérez Hidalgo (Institute for Integrative Systems Biology, University of Valencia, Spain; Arthropod Department, Museum of Natural Sciences of Barcelona, Spain) |
| <b>Hymenoptera (2016)</b>                           | Davide Dal Pos (Department of Biology, University of Central Florida, Orlando, United States)                                                                                                                                                                                                                                                                               |
| <b>Hymenoptera (2017, 2018, 2019)</b>               | Fabrizio Rigato (Sezione di Entomologia, Museo Civico di Storia Naturale, Milan, Italy)                                                                                                                                                                                                                                                                                     |
| <b>Hymenoptera, Apoidea (2016)</b>                  | Marco Bonelli<br>Mauro Gobbi                                                                                                                                                                                                                                                                                                                                                |
| <b>Hymenoptera, Apoidea (2017, 2019)</b>            | Andree Cappellari (Department of Agronomy, Food, Natural Resources, Animals and Environment, University of Padua, Padua, Italy)                                                                                                                                                                                                                                             |
| <b>Hymenoptera, Braconidae</b>                      | Vladimir Žikić (Department of Biology and Ecology, University of Niš, Niš, Serbia)<br>Željko Tomanović (Department of Invertebrate Zoology and Entomology, University of Belgrade, Belgrade, Serbia)                                                                                                                                                                        |
| <b>Hymenoptera, Eulophidae</b>                      | Alex Gumovsky (Department of Taxonomy of Entomophagous Insects and Ecological Principles of Biocontrol, National Academy of Sciences of Ukraine, Kyiv, Ukraine)                                                                                                                                                                                                             |
| <b>Hymenoptera, Formicidae</b>                      | Fabrizio Rigato (Entomology Section, Milan Natural History Museum, Milan, Italy)                                                                                                                                                                                                                                                                                            |
| <b>Hymenoptera, Ichneumonidae</b>                   | Filippo Di Giovanni (Department of Agriculture Food and Environment, University of Pisa, Pisa, Italy)                                                                                                                                                                                                                                                                       |
| <b>Hymenoptera, Mymaridae</b>                       | Riccardo Jesu (Department of Agriculture, University of Naples Federico II, Italy)                                                                                                                                                                                                                                                                                          |
| <b>Hymenoptera, Torymidae</b>                       | Adriano Cazzuoli (Independent Taxonomist, Modena, Italy)                                                                                                                                                                                                                                                                                                                    |
| <b>Lepidoptera</b>                                  | Marco Bonelli                                                                                                                                                                                                                                                                                                                                                               |
| <b>Psocoptera</b>                                   | Rinaldo Nicoli Aldini (Department of Sustainable Crop Production, Università Cattolica del Sacro Cuore, Piacenza-Cremona, Italy)                                                                                                                                                                                                                                            |
| <b>Thysanoptera</b>                                 | Barbara Conti (Department of Agriculture Food and Environment, University of Pisa, Pisa, Italy)                                                                                                                                                                                                                                                                             |

**Table S2.** Molecular identification through COI barcoding. Taxa and sexes, specimen ID and GenBank accession number, primer sets (names, sequences, lengths) and their references, PCR conditions, and the size of the amplicons obtained are reported.

| Taxon (sex)                                          | Specimen ID (GenBank accession number)                                                                | Primer set (names, sequences, lengths)                                           | Reference                                          | PCR protocol                                                                                                      | Amplicon size |
|------------------------------------------------------|-------------------------------------------------------------------------------------------------------|----------------------------------------------------------------------------------|----------------------------------------------------|-------------------------------------------------------------------------------------------------------------------|---------------|
| Hymenoptera<br>Apidae<br><i>Bombus</i> sp.<br>(male) | 2017V02 (OM220090)                                                                                    | Bombus F GGATCNCWGGATATAGCWTTTCC (23)<br>Bombus R TGCAGANGTAAATAAGCTCGTG (23)    | designed with<br>Primer-BLAST [118]<br>and adapted | 94°C for 3', followed by 35 cycles at<br>94°C for 30'', 51°C for 30'', and<br>72°C for 45'', and then 10' at 72°C | 387 bp        |
| Thysanoptera<br>Thripidae<br>(unknown)               | G02* (OM220091)                                                                                       | LCO1490 GGTCACAAATCATAAAGATATTGG (25)<br>HCO2198 TAAACTTCAGGGTGACCAAAAAATCA (25) | [119]                                              | 94°C for 3', followed by 35 cycles at<br>94°C for 30'', 53°C for 30'', and<br>72°C for 45'', and then 10' at 72°C | 649 bp        |
| Diptera<br>Sciaridae<br>(females)                    | H04 (OM220092)<br>H06 (OM220093)<br>2018VV18 (OM220094)<br>2018VV19 (OM220095)<br>2018VV27 (OM220096) |                                                                                  |                                                    |                                                                                                                   |               |

\* Damaged specimen.

**Table S3.** Flower-visiting arthropods sampled during the timed observations. Site and year, specimen ID, order, family, genus, species, stage (A=adult, J=juvenile) and repository are reported. Blank lines mean that taxonomic identification was not achieved. Nomenclature is according to Fauna Europaea [120].

| Site and Year | ID   | Order       | Family         | Genus               | Species                                               | Author            | Stage           | Repository* |
|---------------|------|-------------|----------------|---------------------|-------------------------------------------------------|-------------------|-----------------|-------------|
| SJP2016       | A01  | Psocoptera  | Ectopsocidae   | <i>Ectopsocus</i>   |                                                       | McLachlan, 1899   | A               | CSCU        |
| SJP2016       | A02  | Diptera     | Drosophilidae  |                     |                                                       |                   | A               | MUSE        |
| SJP2016       | A03  | Diptera     | Sphaeroceridae | <i>Leptocera</i>    | <i>Leptocera caenosa</i>                              | (Rondani, 1880)   | A               | SM          |
| SJP2016       | A04  | Diptera     | Sphaeroceridae | <i>Leptocera</i>    | <i>Leptocera caenosa</i>                              | (Rondani, 1880)   | A               | SM          |
| SJP2016       | A05  | Diptera     | Sciaridae      |                     |                                                       |                   | A               | MUSE        |
| SJP2016       | A06  | Diptera     | Anthomyzidae   |                     |                                                       |                   | A               | MUSE        |
| SJP2016       | A07  | Diptera     | Sphaeroceridae | <i>Spelobia</i>     | <i>Spelobia</i> cf. <i>clunipes</i>                   | (Meigen, 1830)    | A               | MUSE        |
| SJP2016       | A08  | Diptera     | Chironomidae   |                     |                                                       |                   | A               | MUSE        |
| SJP2016       | A10  | Diptera     | Phoridae       | <i>Megaselia</i>    | <i>Megaselia rufipes</i>                              | (Meigen, 1804)    | A               | MUSE        |
| SJP2016       | A11  | Hemiptera   | Aphididae      | <i>Chaitophorus</i> |                                                       | Koch, 1854        | A               | UNIMI A     |
| SJP2016       | AA01 | Hymenoptera | Eulophidae     | <i>Baryscapus</i>   |                                                       | Forster, 1856     | A               | UNIMI B     |
| SJP2016       | AA02 | Hymenoptera | Braconidae     | <i>Aphidius</i>     |                                                       | Nees, 1818        | A               | UN          |
| SJP2016       | AA03 | Hymenoptera | Braconidae     | <i>Aphidius</i>     | <i>Aphidius ervi</i>                                  | Haliday, 1834     | A               | UNIMI B     |
| SJP2016       | AA04 | Hymenoptera | Eulophidae     | <i>Baryscapus</i>   |                                                       | Forster, 1856     | A               | UNIMI B     |
| SJP2016       | AA05 | Hymenoptera | Braconidae     | <i>Aphidius</i>     | <i>Aphidius ervi</i>                                  | Haliday, 1834     | A               | UN          |
| SJP2016       | AA06 | Hemiptera   | Aphididae      | <i>Cinara</i>       |                                                       | Curtis, 1835      | A               | UNIMI A     |
| SJP2016       | AA07 | Hymenoptera | Formicidae     | <i>Formica</i>      | <i>Formica lugubris</i>                               | Zetterstedt, 1838 | A <sup>wg</sup> | UNIMI B     |
| SJP2016       | AA08 | Diptera     | Sepsidae       |                     |                                                       |                   | A               | MUSE        |
| SJP2016       | AA09 | Diptera     | Sphaeroceridae | <i>Spelobia</i>     | <i>Spelobia</i> cf. <i>clunipes</i>                   | (Meigen, 1830)    | A               | MUSE        |
| SJP2016       | AA10 | Hymenoptera | Braconidae     | <i>Aphidius</i>     | <i>Aphidius ervi</i>                                  | Haliday, 1834     | A               | UN          |
| SJP2016       | AA11 | Diptera     | Sphaeroceridae | <i>Leptocera</i>    | <i>Leptocera caenosa</i>                              | (Rondani, 1880)   | A               | SM          |
| SJP2016       | AA12 | Hymenoptera | Ichneumonidae  | <i>Aclastus</i>     |                                                       | Forster, 1869     | A               | UNIP        |
| SJP2016       | AA13 | Hymenoptera | Eulophidae     | <i>Baryscapus</i>   |                                                       | Forster, 1856     | A               | UNIMI B     |
| SJP2016       | AA14 | Diptera     | Sciaridae      |                     |                                                       |                   | A               | MUSE        |
| SJP2016       | AA15 | Diptera     | Sciaridae      |                     |                                                       |                   | A               | MUSE        |
| SJP2016       | B01a | Hymenoptera | Formicidae     | <i>Formica</i>      | <i>Formica</i> ( <i>Serviformica</i> ) <i>lemanii</i> | Bondroit, 1917    | A               | UNIMI B     |
| SJP2016       | B01b | Hymenoptera | Formicidae     | <i>Formica</i>      | <i>Formica</i> ( <i>Serviformica</i> ) <i>lemanii</i> | Bondroit, 1917    | A               | UNIMI B     |
| SJP2016       | B01c | Hymenoptera | Formicidae     | <i>Formica</i>      | <i>Formica</i> ( <i>Serviformica</i> ) <i>lemanii</i> | Bondroit, 1917    | A               | UNIMI B     |
| SJP2016       | B02  | Hemiptera   | Aphididae      | <i>Cinara</i>       |                                                       | Curtis, 1835      | A               | UNIMI A     |
| SJP2016       | B03  | Diptera     | Lonchopidae    |                     |                                                       |                   | A               | MUSE        |
| SJP2016       | B04  | Hymenoptera | Formicidae     | <i>Formica</i>      | <i>Formica</i> ( <i>Serviformica</i> ) <i>lemanii</i> | Bondroit, 1917    | A               | UNIMI B     |
| SJP2016       | B05  | Hymenoptera | Formicidae     | <i>Formica</i>      | <i>Formica</i> ( <i>Serviformica</i> ) <i>lemanii</i> | Bondroit, 1917    | A               | UNIMI B     |
| SJP2016       | B06  | Diptera     | Chironomidae   |                     |                                                       |                   | A               | MUSE        |
| SJP2016       | B07  | Hemiptera   | Aphididae      | <i>Chaitophorus</i> |                                                       | Koch, 1854        | A               | UNIMI A     |
| SJP2016       | B08  | Diptera     | Sphaeroceridae | <i>Leptocera</i>    | <i>Leptocera caenosa</i>                              | (Rondani, 1880)   | A               | SM          |
| SJP2016       | B09  | Hemiptera   | Aphididae      | <i>Cinara</i>       |                                                       | Curtis, 1835      | A               | UNIMI A     |
| SJP2016       | B10  | Hemiptera   | Aphididae      | <i>Cinara</i>       |                                                       | Curtis, 1835      | A               | UNIMI A     |
| SJP2016       | B11  | Hymenoptera | Formicidae     | <i>Formica</i>      | <i>Formica</i> ( <i>Serviformica</i> ) <i>lemanii</i> | Bondroit, 1917    | A               | UNIMI B     |
| SJP2016       | B12  | Hymenoptera | Formicidae     | <i>Formica</i>      | <i>Formica</i> ( <i>Serviformica</i> ) <i>lemanii</i> | Bondroit, 1917    | A               | UNIMI B     |
| SJP2016       | B13  | Hymenoptera | Braconidae     | <i>Chorebus</i>     |                                                       | Haliday, 1833     | A               | UN          |

|         |         |              |                |                     |                                            |                     |                 |           |
|---------|---------|--------------|----------------|---------------------|--------------------------------------------|---------------------|-----------------|-----------|
| SJP2016 | B14     | Hymenoptera  | Formicidae     | <i>Formica</i>      | <i>Formica (Serviformica) lemani</i>       | Bondroit, 1917      | A               | UNIMI B   |
| SJP2016 | BB01    | Hymenoptera  | Braconidae     | <i>Aphidius</i>     | <i>Aphidius ervi</i>                       | Haliday, 1834       | A               | UN        |
| SJP2016 | BB02    | Diptera      | Chloropidae    |                     |                                            |                     | A               | MUSE      |
| SJP2016 | BB03    | Hymenoptera  | Formicidae     | <i>Formica</i>      | <i>Formica (Serviformica) lemani</i>       | Bondroit, 1917      | A               | UNIMI B   |
| SJP2016 | BB04    | Diptera      | Sphaeroceridae | <i>Leptocera</i>    | <i>Leptocera caenosa</i>                   | (Rondani, 1880)     | A               | SM        |
| SJP2016 | BB05    | Hymenoptera  | Braconidae     | <i>Diaeretiella</i> |                                            | Stary, 1960         | A               | UN        |
| SJP2016 | BB06    | Hymenoptera  | Formicidae     | <i>Formica</i>      | <i>Formica (Serviformica) lemani</i>       | Bondroit, 1917      | A               | UNIMI B   |
| SJP2016 | BB07    | Hemiptera    | Aphididae      | <i>Cinara</i>       |                                            | Curtis, 1835        | A               | UNIMI A   |
| SJP2016 | BB08    | Hymenoptera  | Braconidae     | <i>Aphidius</i>     |                                            | Nees, 1818          | A               | UN        |
| SJP2016 | BB09    | Hymenoptera  | Torymidae      | <i>Torymus</i>      | <i>Torymus baudysi</i>                     | Boucek, 1954        | A               | AC – pc   |
| SJP2016 | BB10    | Diptera      | Sciaridae      |                     |                                            |                     | A               | MUSE      |
| SJP2016 | BB11    | Hemiptera    | Aphididae      | <i>Chaitophorus</i> |                                            | Koch, 1854          | A               | UNIMI A   |
| SJP2016 | BB12    | Diptera      | Chloropidae    |                     |                                            |                     | A               | MUSE      |
| SJP2016 | BB13    | Hymenoptera  | Braconidae     | <i>Aphidius</i>     | <i>Aphidius ervi</i>                       | Haliday, 1834       | A               | UN        |
| SJP2016 | BB14    | Diptera      | Sciaridae      |                     |                                            |                     | A               | MUSE      |
| SJP2016 | BB15    | Hymenoptera  | Braconidae     | <i>Aphidius</i>     | <i>Aphidius ervi</i>                       | Haliday, 1834       | A               | UN        |
| SJP2016 | BB15bis | Coleoptera   | Staphylinidae  | <i>Amphichroum</i>  | <i>Amphichroum canaliculatum</i>           | (Erichson, 1840)    | A               | MUSE      |
| SJP2016 | BB16    | Diptera      | Sphaeroceridae | <i>Opalimosina</i>  | <i>Opalimosina (Opalimosina) mirabilis</i> | (Collin, 1902)      | A               | SM        |
| BEN2017 | C01     | Thysanoptera | Thripidae      | <i>Thrips</i>       | <i>Thrips vulgatissimus</i>                | Haliday, 1836       | A               | UNIP      |
| BEN2017 | C02     | Diptera      | Chironomidae   | <i>Smittia</i>      |                                            | Holmgren, 1869      | A               | MUSE      |
| BEN2017 | C03     | Hymenoptera  | Mymaridae      | <i>Gonatocerus</i>  |                                            | Nees, 1834          | A               | MSN       |
| BEN2017 | C04     | Diptera      | Agromyzidae    | <i>Chromatomyia</i> | <i>Chromatomyia fuscata</i>                | (Zetterstedt, 1838) | A               | MC – pc   |
| BEN2017 | C05     | Coleoptera   | Meloidae       | <i>Meloe</i>        | <i>Meloe (Meloe) violaceus</i>             | Marsham, 1802       | J               | UNIMI B   |
| BEN2017 | C06     | Oribatida    |                |                     |                                            |                     | A               | UNIMI B   |
| BEN2017 | C07     | Thysanoptera | Thripidae      | <i>Thrips</i>       | <i>Thrips vulgatissimus</i>                | Haliday, 1836       | A               | UNIP      |
| BEN2017 | C08     | Thysanoptera | Thripidae      | <i>Thrips</i>       | <i>Thrips vulgatissimus</i>                | Haliday, 1836       | A               | UNIP      |
| BEN2017 | E01     | Hymenoptera  | Formicidae     | <i>Formica</i>      | <i>Formica (Serviformica) lemani</i>       | Bondroit, 1917      | A               | UNIMI B   |
| BEN2017 | E02     | Hemiptera    | Aphididae      |                     |                                            |                     | A               | UNIMI A   |
| BEN2017 | E03     | Hemiptera    | Aphididae      | <i>Cinara</i>       |                                            | Curtis, 1835        | A               | UNIMI A   |
| BEN2017 | CC01    | Hymenoptera  | Formicidae     | <i>Lasius</i>       | <i>Lasius (Dendrolasius) fuliginosus</i>   | (Latreille, 1798)   | A <sup>wg</sup> | UNIMI B   |
| BEN2017 | CC02    | Thysanoptera | Thripidae      | <i>Thrips</i>       | <i>Thrips vulgatissimus</i>                | Haliday, 1836       | A               | UNIP      |
| BEN2017 | EE01    | Hymenoptera  | Braconidae     | <i>Aphidius</i>     | <i>Aphidius avenae</i>                     | Haliday, 1834       | A               | UNIMI B   |
| BEN2018 | F01     | Diptera      | Anthomyiidae   | <i>Delia</i>        | <i>Delia platura</i>                       | (Meigen, 1826)      | A               | MUSE      |
| BEN2018 | F02     | Diptera      | Anthomyiidae   | <i>Delia</i>        | <i>Delia platura</i>                       | (Meigen, 1826)      | A               | MUSE      |
| BEN2018 | F03     | Diptera      | Anthomyiidae   | <i>Delia</i>        | <i>Delia platura</i>                       | (Meigen, 1826)      | A               | MUSE      |
| BEN2018 | G01     | Araneae      | Linyphiidae    | <i>Agyreta</i>      |                                            | Hull, 1911          | A               | UNIMI B   |
| BEN2018 | G02     | Thysanoptera | Thripidae      | <i>Thrips</i>       | <i>Thrips vulgatissimus</i>                | Haliday, 1836       | A               | BARCODING |
| BEN2018 | G03     | Diptera      | Anthomyiidae   | <i>Delia</i>        | <i>Delia platura</i>                       | (Meigen, 1826)      | A               | MUSE      |
| BEN2018 | G04     | Diptera      | Anthomyiidae   | <i>Delia</i>        | <i>Delia platura</i>                       | (Meigen, 1826)      | A               | MUSE      |
| BEN2018 | G05     | Diptera      | Anthomyiidae   | <i>Delia</i>        | <i>Delia platura</i>                       | (Meigen, 1826)      | A               | MUSE      |
| BEN2018 | FF05    | Diptera      | Anthomyiidae   | <i>Delia</i>        | <i>Delia platura</i>                       | (Meigen, 1826)      | A               | MUSE      |
| BEN2018 | FF06    | Diptera      | Anthomyiidae   | <i>Delia</i>        | <i>Delia platura</i>                       | (Meigen, 1826)      | A               | MUSE      |
| BEN2018 | FF07    | Diptera      | Chloropidae    | <i>Oscinella</i>    | <i>Oscinella (Oscinella) frit</i>          | (Linnaeus. 1758)    | A               | UNIMI B   |

|         |      |              |               |                        |                                       |                     |   |         |
|---------|------|--------------|---------------|------------------------|---------------------------------------|---------------------|---|---------|
| BEN2018 | FF09 | Coleoptera   | Coccinellidae | <i>Coccinella</i>      | <i>Coccinella septempunctata</i>      | Linnaeus, 1758      | A | MUSE    |
| BEN2018 | FF10 | Hymenoptera  | Formicidae    | <i>Formica</i>         | <i>Formica (Serviformica) lemani</i>  | Bondroit, 1917      | A | MSN     |
| BEN2018 | FF11 | Diptera      | Anthomyiidae  | <i>Delia</i>           | <i>Delia platura</i>                  | (Meigen, 1826)      | A | MUSE    |
| BEN2018 | GG01 | Diptera      | Anthomyiidae  | <i>Delia</i>           | <i>Delia platura</i>                  | (Meigen, 1826)      | A | MUSE    |
| BEN2018 | GG02 | Diptera      | Anthomyiidae  | <i>Delia</i>           | <i>Delia platura</i>                  | (Meigen, 1826)      | A | MUSE    |
| BEN2018 | GG03 | Diptera      | Anthomyiidae  | <i>Delia</i>           | <i>Delia platura</i>                  | (Meigen, 1826)      | A | UNIMI B |
| BEN2018 | GG04 | Hymenoptera  | Mymaridae     |                        |                                       |                     | A | MSN     |
| BEN2018 | GG05 | Diptera      | Anthomyiidae  | <i>Delia</i>           | <i>Delia platura</i>                  | (Meigen, 1826)      | A | MUSE    |
| BEN2018 | GG06 | Diptera      | Anthomyiidae  | <i>Delia</i>           | <i>Delia platura</i>                  | (Meigen, 1826)      | A | MUSE    |
| BEN2018 | GG07 | Diptera      | Anthomyiidae  | <i>Paregle</i>         | <i>Paregle coerulescens</i>           | (Strobl, 1893)      | A | MUSE    |
| BEN2018 | GG08 | Diptera      | Anthomyiidae  | <i>Paregle</i>         | <i>Paregle coerulescens</i>           | (Strobl, 1893)      | A | MUSE    |
| BEN2018 | GG09 | Diptera      | Anthomyiidae  | <i>Delia</i>           | <i>Delia platura</i>                  | (Meigen, 1826)      | A | MUSE    |
| BEN2018 | GG10 | Diptera      | Chironomidae  | <i>Camptocladius</i>   | <i>Camptocladius cf. stercorarius</i> | (Da Geer, 1776)     | A | MUSE    |
| BEN2018 | GG11 | Diptera      | Anthomyiidae  | <i>Delia</i>           | <i>Delia platura</i>                  | (Meigen, 1826)      | A | MUSE    |
| BEN2018 | GG12 | Diptera      | Anthomyiidae  | <i>Paregle</i>         | <i>Paregle coerulescens</i>           | (Strobl, 1893)      | A | MUSE    |
| BEN2018 | GG13 | Diptera      | Anthomyiidae  | <i>Pegoplatia</i>      | <i>Pegoplatia aestiva</i>             | Meigen, 1826        | A | MUSE    |
| BEN2018 | GG14 | Diptera      | Drosophilidae | <i>Scaptomyza</i>      | <i>Scaptomyza pallida</i>             | (Zetterstedt, 1847) | A | UZ      |
| BEN2018 | GG15 | Diptera      | Anthomyiidae  | <i>Paregle</i>         | <i>Paregle coerulescens</i>           | (Strobl, 1893)      | A | MUSE    |
| BEN2018 | GG16 | Diptera      | Anthomyiidae  | <i>Paregle</i>         | <i>Paregle coerulescens</i>           | (Strobl, 1893)      | A | MUSE    |
| BEN2018 | GG17 | Diptera      | Anthomyiidae  | <i>Paregle</i>         | <i>Paregle coerulescens</i>           | (Strobl, 1893)      | A | MUSE    |
| BEN2018 | GG18 | Diptera      | Anthomyiidae  | <i>Paregle</i>         | <i>Paregle coerulescens</i>           | (Strobl, 1893)      | A | MUSE    |
| BEN2018 | GG19 | Diptera      | Anthomyiidae  | <i>Paregle</i>         | <i>Paregle coerulescens</i>           | (Strobl, 1893)      | A | MUSE    |
| BEN2018 | GG20 | Diptera      | Anthomyiidae  | <i>Paregle</i>         | <i>Paregle coerulescens</i>           | (Strobl, 1893)      | A | MUSE    |
| BEN2018 | GG21 | Diptera      | Anthomyiidae  | <i>Paregle</i>         | <i>Paregle coerulescens</i>           | (Strobl, 1893)      | A | MUSE    |
| SJP2019 | I01  | Hymenoptera  | Formicidae    | <i>Formica</i>         | <i>Formica (Serviformica) lemani</i>  | Bondroit, 1917      | A | UNIMI B |
| SJP2019 | I02  | Diptera      | Cecidomyiidae |                        |                                       |                     | A | MS – pc |
| SJP2019 | I03  | Hymenoptera  | Formicidae    | <i>Formica</i>         | <i>Formica (Serviformica) lemani</i>  | Bondroit, 1917      | A | UNIMI B |
| SJP2019 | I04  | Hymenoptera  | Formicidae    | <i>Formica</i>         | <i>Formica (Serviformica) lemani</i>  | Bondroit, 1917      | A | UNIMI B |
| SJP2019 | I05  | Hymenoptera  | Formicidae    | <i>Formica</i>         | <i>Formica (Serviformica) lemani</i>  | Bondroit, 1917      | A | UNIMI B |
| SJP2019 | I06  | Hymenoptera  | Formicidae    | <i>Leptothorax</i>     | <i>Leptothorax acervorum</i>          | (Fabricius, 1793)   | A | UNIMI B |
| SJP2019 | I07  | Hymenoptera  | Formicidae    | <i>Formica</i>         | <i>Formica (Serviformica) lemani</i>  | Bondroit, 1917      | A | UNIMI B |
| SJP2019 | I08  | Hymenoptera  | Formicidae    | <i>Formica</i>         | <i>Formica (Serviformica) lemani</i>  | Bondroit, 1917      | A | UNIMI B |
| SJP2019 | I09  | Diptera      | Chironomidae  | <i>Parorthocladius</i> | <i>Parorthocladius cf. nudipennis</i> | (Kieffer, 1908)     | A | MUSE    |
| SJP2019 | I10  | Hymenoptera  | Braconidae    |                        |                                       |                     | A | MSN     |
| SJP2019 | I11  | Coleoptera   | Chrysomelidae | <i>Plagiosterna</i>    | <i>Plagiosterna aenea</i>             | (Linnaeus, 1758)    | A | UNIMI B |
| SJP2019 | I12  | Thysanoptera | Thripidae     | <i>Thrips</i>          | <i>Thrips vulgatissimus</i>           | Haliday, 1836       | A | UNIP    |
| SJP2019 | I13  | Hymenoptera  | Formicidae    | <i>Formica</i>         | <i>Formica (Serviformica) lemani</i>  | Bondroit, 1917      | A | UNIMI B |
| SJP2019 | I14  | Hymenoptera  | Formicidae    | <i>Formica</i>         | <i>Formica (Serviformica) lemani</i>  | Bondroit, 1917      | A | UNIMI B |
| SJP2019 | I15  | Oribatida    |               |                        |                                       |                     | A | UNIMI B |
| SJP2019 | I16  | Collembola   | Entomobryidae | <i>Orchesella</i>      | <i>Orchesella arcuata</i>             | Lindenmann, 1950    | A | UNIMI B |
| SJP2019 | I17  | Hymenoptera  | Scelionidae   |                        |                                       |                     | A | UNIMI B |
| SJP2019 | I18  | Hymenoptera  | Formicidae    | <i>Formica</i>         | <i>Formica (Serviformica) lemani</i>  | Linnaeus, 1758      | A | UNIMI B |
| SJP2019 | I19  | Hymenoptera  | Encyrtidae    |                        |                                       |                     | A | UNIMI B |

|         |     |              |               |                        |                                                       |   |           |
|---------|-----|--------------|---------------|------------------------|-------------------------------------------------------|---|-----------|
| SJP2019 | H01 | Diptera      | Phoridae      | <i>Phora</i>           | Latreille, 1796                                       | A | UC        |
| SJP2019 | H02 | Hymenoptera  | Braconidae    |                        |                                                       | A | MSN       |
| SJP2019 | H03 | Hymenoptera  | Megaspilidae  |                        |                                                       | A | MSN       |
| SJP2019 | H04 | Diptera      | Sciaridae     | <i>Austrosciara</i>    | <i>Austrosciara hyalipennis</i> (Meigen, 1804)        | A | BARCODING |
| SJP2019 | H05 | Hemiptera    | Aphididae     | <i>Brachycaudus</i>    | Van Der Goot, 1913                                    | A | NPH – pc  |
| SJP2019 | H06 | Diptera      | Sciaridae     | <i>Austrosciara</i>    | <i>Austrosciara hyalipennis</i> (Meigen, 1804)        | A | BARCODING |
| SJP2019 | H07 | Diptera      | Chironomidae  | <i>Parorthocladius</i> | <i>Parorthocladius cf. nudipennis</i> (Kieffer, 1908) | A | MUSE      |
| SJP2019 | H08 | Hymenoptera  | Braconidae    |                        |                                                       | A | MSN       |
| SJP2019 | H09 | Hymenoptera  | Figitidae     |                        |                                                       | A | MSN       |
| SJP2019 | H10 | Thysanoptera | Thripidae     | <i>Thrips</i>          | <i>Thrips vulgatissimus</i> Haliday, 1836             | A | UNIPi     |
| SJP2019 | H11 | Hymenoptera  | Encyrtidae    |                        |                                                       | A | MSN       |
| SJP2019 | H12 | Hymenoptera  | Pteromalidae  |                        |                                                       | A | MSN       |
| SJP2019 | H13 | Hymenoptera  | Ceraphronidae |                        |                                                       | A | MSN       |
| SJP2019 | H14 | Hymenoptera  | Megaspilidae  |                        |                                                       | A | MSN       |

\* Repository acronyms: AC – pc: Adriano Cazzuoli – Personal Collection (Italy); CSCU: Department of Sustainable Crop Production, Catholic University of the Sacred Heart (Italy); MC – pc: Miloš Černý – Personal Collection (Czech Republic); MS – pc: Marcela Skuhravá – Personal collection (Czech Republic); MSN: Entomology Section, Milan Natural History Museum (Italy); MUSE: Research and Museum Collections Office Climate and Ecology Unit, MUSE – Science Museum (Italy); NPH – pc: Nicolás Pérez Hidalgo – Personal Collection (Spain); SM: Department of Entomology – Silesian Museum (Czech Republic); UC: Department of Zoology, University of Cambridge (United Kingdom); UN: Department of Biology and Ecology, University of Niš (Serbia); UNIMI A: Department of Food Environmental and Nutritional Sciences, University of Milan (Italy); UNIMI B: Department of Biosciences, University of Milan (Italy); UNIPi: Department of Agriculture Food and Environment, University of Pisa (Italy); UZ: Department of Evolutionary Biology and Environmental Studies, University of Zurich (Switzerland). <sup>wf</sup> = winged gyne

**Table S4.** Flower-visiting arthropods sampled during the free observations. Site and year, specimen ID, order, family, genus, species, stage (A=adult, J=juvenile) and repository are reported. Blank lines mean that taxonomic identification was not achieved. Nomenclature is according to Fauna Europaea [120].

| Site and Year | ID       | Order        | Family        | Genus               | Species                                      | Author                  | Stage | Repository |
|---------------|----------|--------------|---------------|---------------------|----------------------------------------------|-------------------------|-------|------------|
| SPJ2016       | 2016V01  | Hymenoptera  | Ichneumonidae | <i>Probles</i>      | <i>Probles (Microdiaparsis) caudiculatus</i> | Khalaim, 2007           | A     | UNIP       |
| SPJ2016       | 2016V02  | Diptera      | Phoridae      | <i>Megaselia</i>    | <i>Megaselia rufipes</i>                     |                         | A     | MUSE       |
| SPJ2016       | 2016V03  | Diptera      | Ephydriidae   |                     |                                              |                         | A     | MUSE       |
| SPJ2016       | 2016V04  | Hymenoptera  | Braconidae    | <i>Aphidius</i>     | <i>Aphidius ervi</i>                         | Haliday, 1834           | A     | UN         |
| SPJ2016       | 2016V05  | Diptera      | Anthomyiidae  |                     |                                              |                         | A     | MUSE       |
| SPJ2016       | 2016V06  | Hymenoptera  | Torymidae     | <i>Torymus</i>      | <i>Torymus baudysi</i>                       | Boucek, 1954            | A     | AC – pc    |
| SPJ2016       | 2016V07  | Hemiptera    | Aphididae     | <i>Cinara</i>       |                                              | Curtis, 1835            | A     | UNIMI A    |
| SPJ2016       | 2016V08  | Hymenoptera  | Braconidae    | <i>Aphidius</i>     | <i>Aphidius ervi</i>                         | Haliday, 1834           | A     | UN         |
| SPJ2016       | 2016V09  | Hymenoptera  | Apidae        | <i>Bombus</i>       | <i>Bombus lapidarius</i>                     | (Linnaeus, 1758)        | A     | MUSE       |
| SPJ2016       | 2016V10  | Diptera      | Muscidae      | <i>Helina</i>       |                                              | Robineau-Desvoidy, 1830 | A     | MUSE       |
| SPJ2016       | 2016V11  | Hymenoptera  | Torymidae     | <i>Torymus</i>      | <i>Torymus baudysi</i>                       | Boucek, 1954            | A     | AC – pc    |
| SPJ2016       | 2016V12  | Diptera      | Sciaridae     |                     |                                              |                         | A     | MUSE       |
| SPJ2016       | 2016VV01 | Lepidoptera  | Nymphalidae   | <i>Aglais</i>       | <i>Aglais urticae</i>                        | (Linnaeus, 1758)        | A     | UNIMI B    |
| SPJ2016       | 2016VV02 | Hymenoptera  | Eulophidae    | <i>Necremnus</i>    | <i>Necremnus cf. cosconius</i>               | (Walker, 1839)          | A     | UNIMI B    |
| SPJ2016       | 2016VV03 | Diptera      | Anthomyiidae  |                     |                                              |                         | A     | MUSE       |
| SPJ2016       | 2016VV04 | Hymenoptera  | Apidae        | <i>Bombus</i>       | <i>Bombus lapidarius</i>                     | (Linnaeus, 1758)        | A     | MUSE       |
| SPJ2016       | 2016VV05 | Diptera      | Agromyzidae   |                     |                                              |                         | A     | MUSE       |
| SPJ2016       | 2016VV06 | Hymenoptera  | Torymidae     | <i>Torymus</i>      | <i>Torymus baudysi</i>                       | Boucek, 1954            | A     | AC – pc    |
| SPJ2016       | 2016VV07 | Coleoptera   | Curculionidae | <i>Orchestes</i>    | <i>Orchestes (Salius) fagi</i>               | (Linnaeus, 1758)        | A     | MUSE       |
| SPJ2016       | 2016VV08 | Hymenoptera  | Torymidae     | <i>Torymus</i>      | <i>Torymus baudysi</i>                       | Boucek, 1954            | A     | AC – pc    |
| SPJ2016       | 2016VV09 | Hymenoptera  | Torymidae     | <i>Torymus</i>      | <i>Torymus baudysi</i>                       | Boucek, 1954            | A     | AC – pc    |
| SPJ2016       | 2016VV10 | Coleoptera   | Staphylinidae | <i>Amphichroum</i>  | <i>Amphichroum canaliculatum</i>             | (Erichson, 1840)        | A     | MUSE       |
| SPJ2016       | 2016VV11 | Coleoptera   | Curculionidae | <i>Orchestes</i>    | <i>Orchestes (Salius) fagi</i>               | (Linnaeus, 1758)        | A     | MUSE       |
| SPJ2016       | 2016VV12 | Hemiptera    | Aphididae     | <i>Cinara</i>       |                                              | Curtis, 1835            | A     | UNIMI A    |
| BEN2017       | 2017V01  | Coleoptera   | Meloidae      | <i>Meloe</i>        | <i>Meloe (Meloe) violaceus</i>               | Marshall, 1802          | J     | UNIMI B    |
| BEN2017       | 2017V02  | Hymenoptera  | Apidae        | <i>Bombus</i>       | <i>Bombus pratorum</i>                       | (Linnaeus, 1761)        | A     | BARCODING  |
| BEN2017       | 2017V03  | Thysanoptera | Thripidae     | <i>Thrips</i>       | <i>Thrips vulgatissimus</i>                  | Haliday, 1836           | A     | UNIP       |
| BEN2017       | 2017V04  | Hemiptera    | Aphididae     |                     |                                              |                         | A     | UNIMI A    |
| BEN2017       | 2017V05  | Hymenoptera  | Braconidae    | <i>Aphidius</i>     | <i>Aphidius avenae</i>                       | Haliday, 1834           | A     | UNIMI A    |
| BEN2017       | 2017V06  | Diptera      | Anthomyiidae  | <i>Delia</i>        | <i>Delia platura</i>                         | (Meigen, 1826)          | A     | MUSE       |
| BEN2017       | 2017V07  | Diptera      | Anthomyiidae  | <i>Paregle</i>      | <i>Paregle coerulescens</i>                  | (Strobl, 1893)          | A     | UNIMI B    |
| BEN2017       | 2017V08  | Hymenoptera  | Halictidae    | <i>Lasioglossum</i> |                                              | Curtis, 1833            | A     | UNIPD      |
| BEN2017       | 2017V09  | Hymenoptera  | Halictidae    | <i>Lasioglossum</i> |                                              | Curtis, 1833            | A     | UNIPD      |
| BEN2017       | 2017V10  | Diptera      | Anthomyiidae  | <i>Pegoplatia</i>   | <i>Pegoplatia aestiva</i>                    | (Meigen, 1826)          | A     | MUSE       |
| BEN2017       | 2017V10  | Diptera      | Anthomyiidae  | <i>Pegoplatia</i>   | <i>Pegoplatia aestiva</i>                    | Meigen, 1826            | A     | MUSE       |
| BEN2017       | 2017V11  | Diptera      | Anthomyiidae  | <i>Pegoplatia</i>   | <i>Pegoplatia aestiva</i>                    | (Meigen, 1826)          | A     | MUSE       |
| BEN2017       | 2017V12  | Diptera      | Anthomyiidae  |                     |                                              |                         | A     | MUSE       |
| BEN2017       | 2017V13  | Diptera      | Anthomyiidae  | <i>Pegoplatia</i>   | <i>Pegoplatia aestiva</i>                    | (Meigen, 1826)          | A     | MUSE       |
| BEN2017       | 2017V14  | Diptera      | Anthomyiidae  | <i>Pegoplatia</i>   | <i>Pegoplatia aestiva</i>                    | (Meigen, 1826)          | A     | MUSE       |
| BEN2017       | 2017V15  | Diptera      | Anthomyiidae  | <i>Zaphne</i>       | <i>Zaphne frontata</i>                       | (Zetterstedt, 1838)     | A     | MUSE       |



|         |          |              |                |                     |                                         |                              |   |           |
|---------|----------|--------------|----------------|---------------------|-----------------------------------------|------------------------------|---|-----------|
| BEN2017 | 2017VV01 | Hymenoptera  | Braconidae     | <i>Aphidius</i>     | <i>Aphidius avenae</i>                  | Haliday, 1834                | A | UN        |
| BEN2017 | 2017VV02 | Hemiptera    | Aphididae      | <i>Eulachnus</i>    |                                         | Del Guercio, 1909            | A | UNIMI A   |
| BEN2017 | 2017VV03 | Thysanoptera | Thripidae      | <i>Thrips</i>       | <i>Thrips vulgatissimus</i>             | Haliday, 1836                | A | UNIPi     |
| BEN2017 | 2017VV04 | Thysanoptera | Thripidae      | <i>Thrips</i>       | <i>Thrips vulgatissimus</i>             | Haliday, 1836                | A | UNIPi     |
| BEN2017 | 2017VV05 | Thysanoptera | Thripidae      | <i>Thrips</i>       | <i>Thrips tabaci</i>                    | Lindeman, 1889               | A | UNIPi     |
| BEN2017 | 2017VV06 | Diptera      | Chloropidae    | <i>Oscinella</i>    | <i>Oscinella (Oscinella) frit</i>       | (Linnaeus, 1758)             | A | UNIMI B   |
| BEN2017 | 2017VV07 | Thysanoptera | Thripidae      | <i>Thrips</i>       | <i>Thrips vulgatissimus</i>             | Haliday, 1836                | A | UNIPi     |
| BEN2017 | 2017VV08 | Diptera      | Anthomyiidae   | <i>Delia</i>        | <i>Delia platura</i>                    | (Meigen, 1826)               | A | MUSE      |
| BEN2017 | 2017VV09 | Hymenoptera  | Braconidae     | <i>Aphidius</i>     | <i>Aphidius ervi</i>                    | Haliday, 1834                | A | UNIMI B   |
| BEN2018 | 2018V01  | Diptera      | Anthomyiidae   | <i>Zaphne</i>       | <i>Zaphne frontata</i>                  | (Zetterstedt, 1838)          | A | MUSE      |
| BEN2018 | 2018V02  | Hymenoptera  | Figitidae      |                     |                                         |                              | A | MSN       |
| BEN2018 | 2018V03  | Hymenoptera  | Formicidae     | <i>Myrmica</i>      | <i>Myrmica sulcinodis</i>               | Nylander, 1846               | A | MSN       |
| BEN2018 | 2018V04  | Araneae      | Linyphiidae    | <i>Bathyphantes</i> | <i>Bathyphantes setiger</i>             | F.O. Pickard-Cambridge, 1894 | A | UNIMI B   |
| BEN2018 | 2018V05  | Diptera      | Anthomyiidae   | <i>Delia</i>        | <i>Delia platura</i>                    | (Meigen, 1826)               | A | MUSE      |
| BEN2018 | 2018V06  | Diptera      | Anthomyiidae   | <i>Paregle</i>      | <i>Paregle coerulescens</i>             | (Strobl, 1893)               | A | MUSE      |
| BEN2018 | 2018V07  | Diptera      | Anthomyiidae   | <i>Paregle</i>      | <i>Paregle coerulescens</i>             | (Strobl, 1893)               | A | MUSE      |
| BEN2018 | 2018V08  | Araneae      | Linyphiidae    | <i>Agyneta</i>      |                                         |                              | J | UNIMI B   |
| BEN2018 | 2018V10  | Diptera      | Anthomyiidae   | <i>Paregle</i>      | <i>Paregle coerulescens</i>             | (Strobl, 1893)               | A | MUSE      |
| BEN2018 | 2018VV01 | Diptera      | Anthomyiidae   | <i>Delia</i>        | <i>Delia platura</i>                    | (Meigen, 1826)               | A | MUSE      |
| BEN2018 | 2018VV02 | Diptera      | Anthomyiidae   | <i>Delia</i>        | <i>Delia platura</i>                    | (Meigen, 1826)               | A | MUSE      |
| BEN2018 | 2018VV03 | Hymenoptera  | Ichneumonidae  |                     |                                         |                              | A | MSN       |
| BEN2018 | 2018VV04 | Diptera      | Syrphidae      | <i>Scaeva</i>       | <i>Scaeva dignota</i>                   | (Rondani, 1857)              | A | DS – pc   |
| BEN2018 | 2018VV05 | Hymenoptera  | Formicidae     | <i>Myrmica</i>      | <i>Myrmica sulcinodis</i>               | Nylander, 1846               | A | MSN       |
| BEN2018 | 2018VV06 | Araneae      | Linyphiidae    | <i>Agyneta</i>      |                                         |                              | J | UNIMI B   |
| BEN2018 | 2018VV07 | Diptera      | Anthomyiidae   | <i>Delia</i>        | <i>Delia platura</i>                    | (Meigen, 1826)               | A | MUSE      |
| BEN2018 | 2018VV08 | Diptera      | Scathophagidae | <i>Scathophaga</i>  | <i>Scathophaga stercoraria</i>          | (Linnaeus, 1758)             | A | UNIMI B   |
| BEN2018 | 2018VV09 | Diptera      | Anthomyiidae   | <i>Delia</i>        | <i>Delia platura</i>                    | (Meigen, 1826)               | A | MUSE      |
| BEN2018 | 2018VV10 | Diptera      | Anthomyiidae   | <i>Delia</i>        | <i>Delia platura</i>                    | (Meigen, 1826)               | A | MUSE      |
| BEN2018 | 2018VV11 | Diptera      | Anthomyiidae   | <i>Delia</i>        | <i>Delia platura</i>                    | (Meigen, 1826)               | A | MUSE      |
| BEN2018 | 2018VV12 | Diptera      | Anthomyiidae   | <i>Delia</i>        | <i>Delia platura</i>                    | (Meigen, 1826)               | A | MUSE      |
| BEN2018 | 2018VV13 | Coleoptera   | Staphylinidae  | <i>Philonthus</i>   | <i>Philonthus (Philonthus) frigidus</i> | Markel & Kiesenwetter, 1848  | A | MUSE      |
| BEN2018 | 2018VV14 | Diptera      | Anthomyiidae   | <i>Paregle</i>      | <i>Paregle coerulescens</i>             | (Strobl, 1893)               | A | MUSE      |
| BEN2018 | 2018VV15 | Hymenoptera  | Ichneumonidae  |                     |                                         |                              | A | MSN       |
| BEN2018 | 2018VV16 | Diptera      | Anthomyiidae   | <i>Delia</i>        | <i>Delia platura</i>                    | (Meigen, 1826)               | A | MUSE      |
| BEN2018 | 2018VV17 | Diptera      | Anthomyiidae   | <i>Delia</i>        | <i>Delia platura</i>                    | (Meigen, 1826)               | A | MUSE      |
| BEN2018 | 2018VV18 | Diptera      | Sciaridae      | <i>Corynoptera</i>  | <i>Corynoptera trepida</i>              | (Winnertz, 1867)             | A | BARCODING |
| BEN2018 | 2018VV19 | Diptera      | Sciaridae      | <i>Corynoptera</i>  | <i>Corynoptera trepida</i>              | (Winnertz, 1867)             | A | BARCODING |
| BEN2018 | 2018VV20 | Diptera      | Anthomyiidae   | <i>Zaphne</i>       | <i>Zaphne frontata</i>                  | (Zetterstedt, 1838)          | A | MUSE      |
| BEN2018 | 2018VV21 | Diptera      | Anthomyiidae   | <i>Delia</i>        | <i>Delia platura</i>                    | (Meigen, 1826)               | A | MUSE      |
| BEN2018 | 2018VV22 | Diptera      | Anthomyiidae   | <i>Paregle</i>      | <i>Paregle coerulescens</i>             | (Strobl, 1893)               | A | MUSE      |
| BEN2018 | 2018VV23 | Diptera      | Anthomyiidae   | <i>Paregle</i>      | <i>Paregle coerulescens</i>             | (Strobl, 1893)               | A | MUSE      |
| BEN2018 | 2018VV24 | Diptera      | Anthomyiidae   | <i>Paregle</i>      | <i>Paregle coerulescens</i>             | (Strobl, 1893)               | A | MUSE      |
| BEN2018 | 2018VV25 | Collembola   | Entomobryidae  | <i>Orchesella</i>   |                                         | Templeton, 1835              | A | UNIMI B   |

|         |           |             |                |                  |                                        |                   |   |           |
|---------|-----------|-------------|----------------|------------------|----------------------------------------|-------------------|---|-----------|
| BEN2018 | 2018VV26  | Diptera     | Anthomyiidae   | <i>Delia</i>     | <i>Delia platura</i>                   | (Meigen, 1826)    | A | MUSE      |
| BEN2018 | 2018VV27  | Diptera     | Sciaridae      |                  |                                        |                   | A | BARCODING |
| BEN2018 | 2018VV28  | Diptera     | Anthomyiidae   | <i>Paregle</i>   | <i>Paregle coerulescens</i>            | (Strobl, 1893)    | A | MUSE      |
| BEN2018 | 2018VV29  | Diptera     | Anthomyiidae   | <i>Paregle</i>   | <i>Paregle coerulescens</i>            | (Strobl, 1893)    | A | MUSE      |
| BEN2018 | 2018VV30  | Araneae     | Theridiidae    |                  |                                        |                   | J | UNIMI B   |
| BEN2018 | 2018VV31  | Diptera     | Anthomyiidae   | <i>Delia</i>     | <i>Delia platura</i>                   | (Meigen, 1826)    | A | MUSE      |
| BEN2018 | 2018VV32  | Diptera     | Anthomyiidae   | <i>Delia</i>     | <i>Delia platura</i>                   | (Meigen, 1826)    | A | MUSE      |
| BEN2018 | 2018VV33  | Diptera     | Anthomyiidae   | <i>Delia</i>     | <i>Delia platura</i>                   | (Meigen, 1826)    | A | MUSE      |
| BEN2018 | 2018VIS01 | Diptera     | Anthomyiidae   | <i>Delia</i>     | <i>Delia platura</i>                   | (Meigen, 1826)    | A | MUSE      |
| BEN2018 | 2018VIS02 | Diptera     | Anthomyiidae   | <i>Delia</i>     | <i>Delia platura</i>                   | (Meigen, 1826)    | A | MUSE      |
| BEN2018 | 2018VIS03 | Diptera     | Anthomyiidae   | <i>Delia</i>     | <i>Delia platura</i>                   | (Meigen, 1826)    | A | MUSE      |
| BEN2018 | 2018VIS04 | Diptera     | Anthomyiidae   | <i>Delia</i>     | <i>Delia platura</i>                   | (Meigen, 1826)    | A | MUSE      |
| BEN2018 | 2018VIS05 | Diptera     | Anthomyiidae   | <i>Delia</i>     | <i>Delia platura</i>                   | (Meigen, 1826)    | A | MUSE      |
| BEN2018 | 2018VIS06 | Diptera     | Anthomyiidae   | <i>Delia</i>     | <i>Delia platura</i>                   | (Meigen, 1826)    | A | MUSE      |
| BEN2018 | 2018VIS07 | Diptera     | Anthomyiidae   | <i>Delia</i>     | <i>Delia platura</i>                   | (Meigen, 1826)    | A | MUSE      |
| BEN2018 | 2018VIS08 | Diptera     | Anthomyiidae   | <i>Delia</i>     | <i>Delia platura</i>                   | (Meigen, 1826)    | A | MUSE      |
| BEN2018 | 2018VIS09 | Diptera     | Anthomyiidae   | <i>Delia</i>     | <i>Delia platura</i>                   | (Meigen, 1826)    | A | MUSE      |
| BEN2018 | 2018VIS10 | Diptera     | Anthomyiidae   | <i>Delia</i>     | <i>Delia platura</i>                   | (Meigen, 1826)    | A | MUSE      |
| BEN2018 | 2018VIS11 | Diptera     | Anthomyiidae   | <i>Delia</i>     | <i>Delia platura</i>                   | (Meigen, 1826)    | A | MUSE      |
| BEN2018 | 2018VIS12 | Diptera     | Anthomyiidae   | <i>Delia</i>     | <i>Delia platura</i>                   | (Meigen, 1826)    | A | MUSE      |
| BEN2018 | 2018VIS13 | Diptera     | Anthomyiidae   | <i>Delia</i>     | <i>Delia platura</i>                   | (Meigen, 1826)    | A | MUSE      |
| BEN2018 | 2018VIS15 | Diptera     | Anthomyiidae   | <i>Paregle</i>   | <i>Paregle coerulescens</i>            | (Strobl, 1893)    | A | MUSE      |
| BEN2018 | 2018VIS16 | Diptera     | Syrphidae      | <i>Eristalis</i> | <i>Eristalis similis</i>               | (Fallen, 1817)    | A | DS – pc   |
| BEN2018 | 2018VIS17 | Hemiptera   | Cicadellidae   |                  |                                        |                   | J | UNIMI A   |
| BEN2018 | 2018VIS18 | Diptera     | Anthomyiidae   | <i>Delia</i>     | <i>Delia platura</i>                   | (Meigen, 1826)    | A | MUSE      |
| BEN2018 | 2018VIS19 | Diptera     | Anthomyiidae   | <i>Delia</i>     | <i>Delia platura</i>                   | (Meigen, 1826)    | A | MUSE      |
| BEN2018 | 2018VIS20 | Diptera     | Anthomyiidae   | <i>Paregle</i>   | <i>Paregle coerulescens</i>            | (Strobl, 1893)    | A | MUSE      |
| SJP2019 | 2019V01   | Coleoptera  | Cantharidae    | <i>Cantharis</i> | <i>Cantharis (Cantharis) nigricans</i> | Müller, 1766      | A | MUSE      |
| SJP2019 | 2019V02   | Hymenoptera | Tenthredinidae | <i>Dolerus</i>   |                                        | Panzer, 1801      | A | MSN       |
| SJP2019 | 2019V03   | Hymenoptera | Andrenidae     | <i>Andrena</i>   | <i>Andrena lapponica</i>               | Zetterstedt, 1838 | A | UNIPD     |
| SJP2019 | 2019V04   | Diptera     | Anthomyiidae   | <i>Delia</i>     | <i>Delia platura</i>                   | (Meigen, 1826)    | A | UNIMI B   |

\* Repository acronyms: AC – pc: Adriano Cazzuoli – Personal Collection (Italy); DS – pc: Daniele Sommaggio – Personal Collection (Italy) MSN: Marcela Skuhrová – Personal collection (Czech Republic); MUSE: Research and Museum Collections Office Climate and Ecology Unit, MUSE – Science Museum (Italy); UN: Department of Biology and Ecology, University of Niš (Serbia); UNIMI A: Department of Food Environmental and Nutritional Sciences, University of Milan (Italy); UNIMI B: Department of Biosciences, University of Milan (Italy); UNIPD: Department of Agronomy Food Natural Resources Animals and Environment, University of Padova (Italy); UNIP: Department of Agriculture Food and Environment, University of Pisa (Italy).

**Table S5.** Model performances. Likelihood ratio test and pseudo R<sup>2</sup>.

| <b>Model</b>     | <b>Likelihood ratio test</b> |                    |         | <b>pseudo R<sup>2</sup></b> | <b>Method</b>               |
|------------------|------------------------------|--------------------|---------|-----------------------------|-----------------------------|
|                  | df                           | Explained deviance | p       | pseudo R <sup>2</sup> value |                             |
| <b>Presence</b>  | 6                            | 31.230             | < 0.001 | 0.515                       | Tjur's R <sup>2</sup>       |
| <b>Diversity</b> | 6                            | 48.709             | < 0.001 | 0.732                       | Nagelkerke's R <sup>2</sup> |
| <b>Abundance</b> | 6                            | 60.923             | < 0.001 | 0.711                       | Nagelkerke's R <sup>2</sup> |

**Table S6.** Effect of micrometeorological and context variables on flying flower visitors. Asterisk indicates statistically significant effects.

|                          | <b>Presence</b>                | <b>Diversity</b>                | <b>Abundance</b>                |
|--------------------------|--------------------------------|---------------------------------|---------------------------------|
| <b>Temperature</b>       | $\chi^2_1 = 9.66, p < 0.001 *$ | $\chi^2_1 = 9.54, p < 0.01 *$   | $\chi^2_1 = 19.82, p < 0.001 *$ |
| <b>Wind Speed</b>        | $\chi^2_1 = 0.22, p = 0.635$   | $\chi^2_1 = 0.00, p = 0.965$    | $\chi^2_1 = 0.89, p = 0.345$    |
| <b>Time (quadratic)</b>  | $\chi^2_1 = 2.35, p = 0.125$   | $\chi^2_1 = 2.56, p = 0.109$    | $\chi^2_1 = 5.20, p < 0.05 *$   |
| <b>Number of flowers</b> | $\chi^2_1 = 0.02, p = 0.885$   | $\chi^2_1 = 0.09, p = 0.761$    | $\chi^2_1 = 0.07, p = 0.789$    |
| <b>Site</b>              | $\chi^2_1 = 5.55, p < 0.05 *$  | $\chi^2_1 = 25.24, p < 0.001 *$ | $\chi^2_1 = 17.03, p < 0.001 *$ |
